# Supplementary material
Source: publisher site journal article supplement (https://www.dovepress.com/article/504289)
Supplement: Supplementary file 1 [file get_supplementary_file.php]

|  | **Healthy Controls** | | **AVD Patients** | |
| --- | --- | --- | --- | --- |
|  | **Men** | **Women** | **Men** | **Women** |
| N | 12 | 10 | 9 | 8 |
| **Degree of aortic regurgitation (%)** |  |  |  |  |
| No | 12 (100.0%) | 10 (100.0%) | 3 (17.54) | 1 (5.88) |
| Mild |  |  | 3 (17.54) | 2 (11.76) |
| Moderate |  |  | 3 (17.54) | 3 (17.54) |
| Severe |  |  | - | 2 (11.76) |
| **Stenosis (%)** |  |  |  |  |
| No | 12 (100.0%) | 10 (100.0%) | 4 (23.53) | 2 (11.76) |
| Severe |  |  | 5 (29.41) | 6 (35.30) |

**Table S1. Degree of regurgitation and presence of stenosis in the studied subjects.**

N: Number of subjects; AVD: Aortic valve diseases

**Table S2: Logistic Regression Model to differentiate healthy controls and AVD patients.**

| **Variable** | **B** | **SE** | **Wald** | **Df** | **p-value** | **OR** | **95% CI for OR** | |
| --- | --- | --- | --- | --- | --- | --- | --- | --- |
| **Lower** | **Upper** |
| **PGC1a** | -0.040 | 0.044 | 0.816 | 1 | 0.366 | 0.961 | 0.880 | 1.048 |
| **MOTS-c** | -30.893 | 13.563 | 5.188 | 1 | 0.023 | 0.003 | <0.001 | 0.013 |
| **CS** | -0.448 | 1.034 | 0.188 | 1 | 0.665 | 0.639 | 0.084 | 4.852 |
| **Constant** | 7.894 | 3.255 | 5.881 | 1 | 0.015 | 2682.05 |  |  |

AVD: Aortic valve diseases; B = regression parameter; SE: Standard error; df = degrees of freedom; CI: Confidence interval; OR = odds ratio; SE = Standard error; PGC1α: Peroxisome proliferator-activated receptor gamma coactivator 1-alpha; MOTS-c: Mitochondrial open reading frame of the 12S rRNA type-c; CS: Citrate synthase.
